# Supplementary material
Source: Springer Nature journal article supplement (https://www.springermedizin.de/resource/supplementary/13000_2013_920_MOESM1_ESM.pdf/9625710)

**a**

SAA1 mRNA relative expression

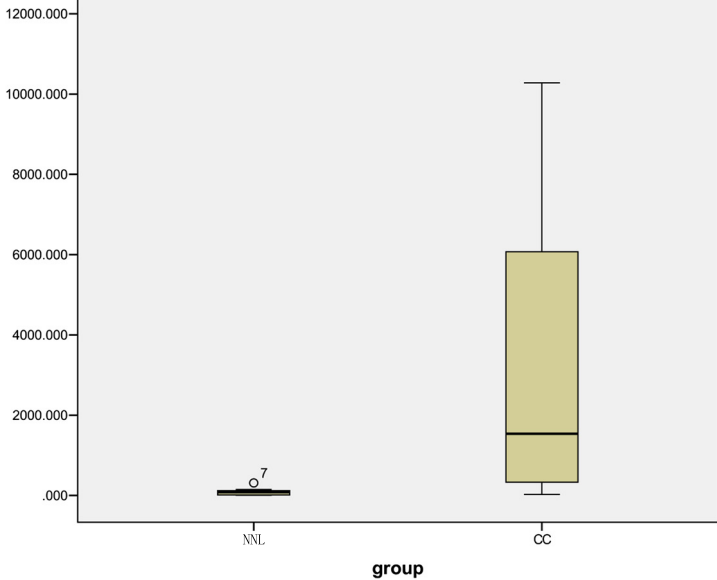**b**

SAA4 mRNA relative expression

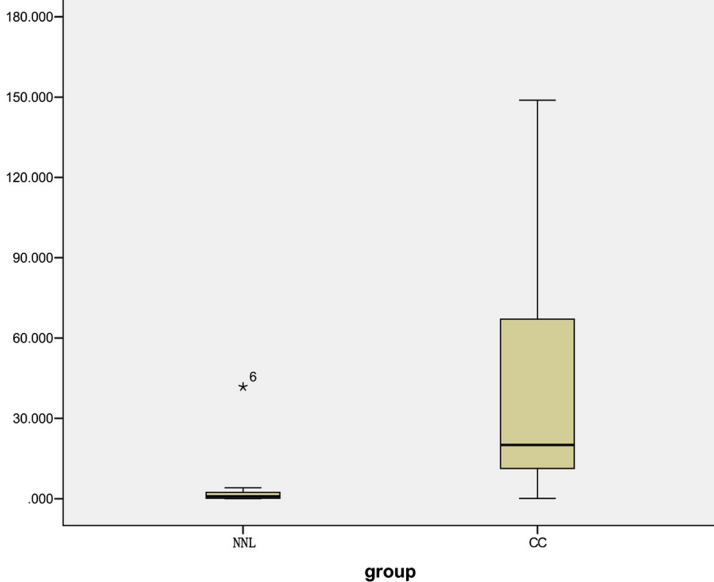

Supplement: MOESM1 [file 9625710]
